# Supplementary material
Source: Springer Nature journal article supplement (https://www.springermedizin.de/resource/supplementary/12936_2007_402_MOESM3_ESM.pdf/9547726)

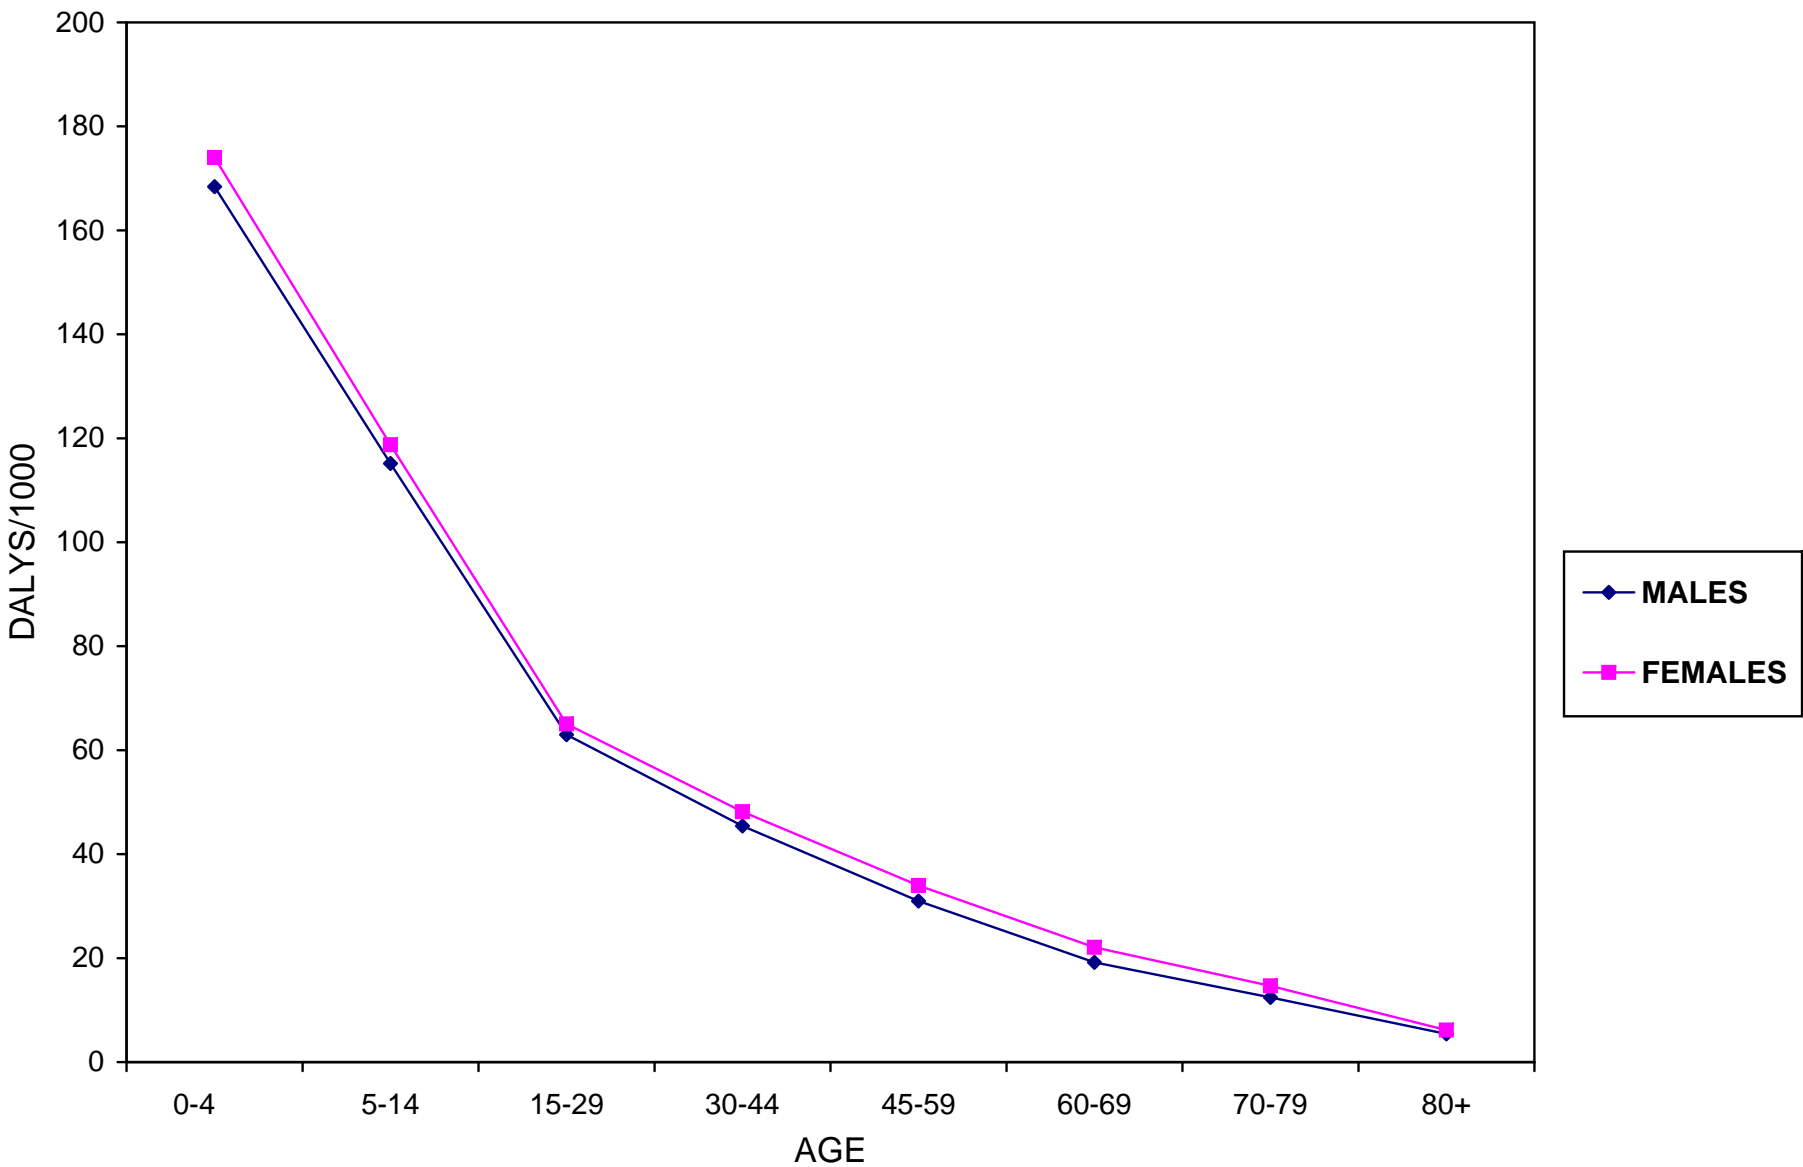

Supplement: MOESM3 [file 9547726]
